# Supplementary material for: Validation and clinical application of transactivation assays for RUNX1 variant classification
Source: PubMed Central journal article supplement — Blood Adv. 2022 May 27;6(11):3195–200. doi: 10.1182/bloodadvances.2021006161 (PMC9198940; doi:10.1182/bloodadvances.2021006161), 2022-05-27
Supplement: advancesADV2021006161-suppl1.pdf [file advancesADV2021006161-suppl1.pdf]

Supplementary Table 1. Investigated *RUNX1* variants

| Chr.21<br>(GRCh38) | RUNX1b (NM_001001890.3) |                   | RUNX1c (NM_001754.5) |                    |
|--------------------|-------------------------|-------------------|----------------------|--------------------|
|                    | genomic location        | nucleotide change | protein change       | nucleotide change  |
| g.34887027         | c.86T>C                 | p.(Leu29Ser)      | c.167T>C             | p.(Leu56Ser)       |
| g.34880568         | c.416G>A                | p.(Arg139Gln)     | c.497G>A             | p.(Arg166Gln)      |
| g.34886941         | c.172C>A                | p.(His58Asn)      | c.253C>A             | p.(His85Asn)       |
| g.34886914         | c.199A>C                | p.(Ser67Arg)      | c.280A>C             | p.(Ser94Arg)       |
| g.34886875         | c.238C>A                | p.(Arg80Ser)      | c.319C>A             | p.(Arg107Ser)      |
| g.34880713         | c.271_283del            | p.(Val91Glyfs*11) | c.352_364del         | p.(Val118Glyfs*11) |
| g.34880698         | c.286G>C                | p.(Asp96His)      | c.367G>C             | p.(Asp123His)      |
| g.34880644         | c.340T>G                | p.(Ser114Ala)     | c.421T>G             | p.(Ser141Ala)      |
| g.34880557         | c.427G>C                | p.(Gly143Arg)     | c.508G>C             | p.(Gly170Arg)      |
| g.34834521         | c.613C>T                | p.(Arg205Trp)     | c.694C>T             | p.(Arg232Trp)      |
| g.34834482         | c.652C>T                | p.(Pro218Ser)     | c.733C>T             | p.(Pro245Ser)      |
| g.34834466         | c.668G>A                | p.(Arg223His)     | c.749G>A             | p.(Arg250His)      |
| g.34799412         | c.775C>A                | p.(Gln259Lys)     | c.856C>A             | p.(Gln286Lys)      |
| g.34880569         | c.415C>T                | p.(Arg139*)       | c.496C>T             | p.(Arg166*)        |
| g.34859486         | c.520C>T                | p.(Arg174*)       | c.601C>T             | p.(Arg201*)        |
| g.34834431         | c.703C>T                | p.(Gln235*)       | c.784C>T             | p.(Gln262*)        |
| g.34792575         | c.922C>T                | p.(Gln308*)       | c.1003C>T            | p.(Gln335*)        |
| g.34792415         | c.1082C>A               | p.(Ser361*)       | c.1163C>A            | p.(Ser388*)        |
| g.34792314         | c.1183G>T               | p.(Arg395*)       | c.1264G>T            | p.(Glu422*)        |
| g.34792158         | c.1339G>T               | p.(Glu447*)       | c.1420G>T            | p.(Glu474*)        |

Supplementary Table 2. Primer sequences

| variant       | sequence                                                                                   | oligo name                                              |
|---------------|--------------------------------------------------------------------------------------------|---------------------------------------------------------|
| Leu29Ser      | AGATGAGCGAGGGCTGCCGCTGGGCGCCCC<br>GGGGCGCCAGCGCGGACGCTCGTCTATCT                            | RUNX1_sdm86_f<br>RUNX1_sdm86_r                          |
| His58Asn      | GTGCTGGCCGACAACCCGGCGAGC<br>GCTCGCCGGTTGTCCGCCAGCAC                                        | RUNX1b_172C>A_fw<br>RUNX1b_172C>A_rev                   |
| Ser67Arg      | GGTGGCACCACCGCCCACTTCC<br>GGAAGTTGGGCGGTGCGTGGCCACC                                        | RUNX1b_199A>C_fw<br>RUNX1b_199A>C_rev                   |
| Arg80Ser      | CTGCCTACGCACTGGAGCTGCAACAAGACC<br>GGTCTTGTTCAGCTCCAGTGCCTAGGCAG                            | RUNX1_sdm_c.238C>A_f<br>RUNX1_sdm_c.238C>A_r            |
| Val91Glyfs*11 | CGTTTCAAGGGGATGTTCAGATGGCACTCTGGTCACTGTGTATGGC<br>GGAACATCCCTTGAAAGCGATGGGCGAGGCTTGTTCAGCG | RUNX1_sdm_c.271_283del_fw<br>RUNX1_sdm_c.271_283del_rev |
| Asp96His      | GGTGGCCCTAGGGCATGTTCCAGATGGC<br>GCCATCTGGAACATGCCCTAGGGCCACC                               | RUNX1b_sdm_286G>C_f<br>RUNX1b_sdm_286G>C_r              |
| Ser114Ala     | GCAATGATGAAAACACTACGCGGTGAGCTGAGAAATGC<br>GCATTTCTCAGCTCAGCCGCTAGTTTTCATCATTGC             | RUNX1b_340T>G_fw<br>RUNX1b_340T>G_rev                   |
| Arg139*       | CCTCAGGTTTGTGCGTTGAAGTGGAAGAGGGAA<br>TTCCCTCTCCACTTCAACCGACAACCTGAGG                       | RUNX1_sdm415_f<br>RUNX1_sdm415_r                        |
| Arg139Gln     | CCTCAGGTTTGTGCGTCAAAGTGGAAGAGGGAA<br>TTCCCTCTCCACTTTCACCGACAACCTGAGG                       | RUNX1_sdm416_f<br>RUNX1_sdm416_r                        |
| Gly143Arg     | CGGTCGAAAGTGGAAGACGGAAAAGTTCACCTCTG<br>CAGAGTGAAAGCTTTCCGTCTCCACTTCGACCG                   | RUNX1_sdm_c.427G>C_fw1<br>RUNX1_sdm_c.427G>C_rev1       |
| Arg174*       | CAGTGGATGGCCCTGAGAACCTCGAAGA<br>TCTTCGAGTTCTCAGGGCCATCCACTG                                | RUNX1_C520T_fw<br>RUNX1_C520T_rev                       |
| Arg205Trp     | CTGGAGCAGCTGTGGCGCACAGCCATG<br>CATGGCTGTGCCACAGCTGCTCCAG                                   | RUNX1b_sdm_613C>T_f<br>RUNX1b_sdm_613C>T_r              |
| Pro218Ser     | CACCACCCAGCCTCCAGGCCAACCC<br>GGTTGGGCGTGGAGGCTGGTGGTGG                                     | RUNX1b_sdm_c.652C>T_f<br>RUNX1b_sdm_c.652C>T_r          |
| Arg223His     | CGCCCAACCCTATGCCTCCCTGAACCA<br>TGGTTCAGGGAGGCATGAGGGTTGGGCG                                | RUNX1b_sdm_668G>A_f<br>RUNX1b_sdm_668G>A_r              |
| Gln235*       | CCACTGCCTTTAACCTTAGCCTCAGAGTCAGATGC<br>GCATCTGACTCTGAGGCTAAGGTTAAAGCCAGTGG                 | RUNX1b_sdm_703C>T_f<br>RUNX1b_sdm_703C>T_r              |
| Gln259Lys     | CCTACGATCAGTCTACAAATACCTGGGATCCATTG<br>CAATGGATCCCAGGTATTGTAGGACTGATCGTAGGAC               | RUNX1_sdm_c.775C>A_fw<br>RUNX1_sdm_c.775C>A_rev         |
| Gln308*       | GCGACCCGCGCTAGTTCCTCCCGCGC<br>GCGCGGGAACTGGCGGGTTCGC                                       | RUNX1b_sdm_c.922C>T_f<br>RUNX1b_sdm_c.922C>T_r          |
| Ser361*       | CCCTACCCCGGCTAGTCGAAGCGC<br>GCGCTTGCAGTACCGGGGTAGGG                                        | RUNX1b_sdm_c.1082C>A_f<br>RUNX1b_sdm_c.1082C>A_r        |
| Glu395*       | CATGGTGGGCGCTAGCGCTCGCCGCC<br>GGCGGCGAGCGCTAGCCGCCACATG                                    | RUNX1_sdm_c.1183G>T_fw<br>RUNX1_sdm_c.1183G>T_rev       |
| Glu447*       | CCTCCGCGCGCTGGAGTAGGCCGTGTGGAGGCC<br>GGCTCCACACGGCTACTCCAGGCGCGGGAGG                       | RUNX1b_sdm_1339G>T_f<br>RUNX1b_sdm_1339G>T_r            |

Supplementary Table 3. Variant classification following present classification guidelines

| RUNX1b (NM_001001890.3) |              | gnomAD max. frequency | REVEL score | ClinVar ID RCV associated with RUNX1-FPD                         | ACMG/AMP <sup>1</sup> + MM-VCEP criteria <sup>2</sup>                                                       | func. criteria our assays                       | func.criteria incl. literature                                                                                                                                      | classification w/o func. criteria | classification w/ func. criteria | report of germline variant carriers in literature                                                                        | reference to Fig. 2, applied genetic testing approach                                                                                           |
|-------------------------|--------------|-----------------------|-------------|------------------------------------------------------------------|-------------------------------------------------------------------------------------------------------------|-------------------------------------------------|---------------------------------------------------------------------------------------------------------------------------------------------------------------------|-----------------------------------|----------------------------------|--------------------------------------------------------------------------------------------------------------------------|-------------------------------------------------------------------------------------------------------------------------------------------------|
| protein change          | cDNA change  |                       |             |                                                                  |                                                                                                             |                                                 |                                                                                                                                                                     |                                   |                                  |                                                                                                                          |                                                                                                                                                 |
| p.(His58Asn)            | c.172C>A     | 0.000439 (EA)         | 0.8519      | RCV000549373.5<br>1xVUS (Invitae) <sup>†</sup><br>1xLB (MM-VCEP) | BS1 strong<br>PP3 supporting                                                                                | PS3 supporting                                  | uncertain function <sup>‡</sup><br>PMID 23817177 <sup>3</sup> (normal TA, DNA binding, dimerization)                                                                | VUS                               | VUS                              | PMID 34233450 <sup>4</sup>                                                                                               |                                                                                                                                                 |
| p.(Ser67Arg)            | c.199A>C     |                       | 0.947       |                                                                  | PS4 supporting<br>PM2 moderate<br>PP3 supporting                                                            | PS3 moderate                                    | PS3 strong<br>PMID 23817177 <sup>3</sup> and PMID: 17290219 <sup>5</sup> (dimerization defect)                                                                      | VUS                               | likely pathogenic                | PMID 34233450 <sup>4</sup>                                                                                               |                                                                                                                                                 |
| p.(Ser67Arg)            | c.201C>G     |                       | 0.911       |                                                                  | PS4 supporting<br>PS1 moderate (c.199A>C)<br>PM2 moderate<br>PP3 supporting                                 | PS3 moderate                                    | PS3 strong<br>PMID 23817177 <sup>3</sup> and PMID: 17290219 <sup>5</sup> (dimerization defect)                                                                      | likely pathogenic                 | likely pathogenic                |                                                                                                                          | Fig. 2A<br>Custom NGS panel <sup>‡</sup> ; NGS-based copy number analysis                                                                       |
| p.(Arg80Ser)            | c.238C>A     |                       | 0.921       | RCV001062338.2<br>VUS (Invitae) <sup>†</sup>                     | PS4 moderate (incl. ClinVar)<br>PM1 moderate<br>PM2 moderate<br>PP3 supporting<br>PM5 supporting (Arg80His) | PS3 moderate                                    | PS3 moderate                                                                                                                                                        | likely pathogenic                 | likely pathogenic                |                                                                                                                          | Fig. 2B<br><i>Trusight Myeloid</i> NGS panel (Illumina); no copy number analysis performed                                                      |
| p.(Asp96His)            | c.286G>C     | 0.00002639 (NFE)      | 0.943       |                                                                  | PM1 supporting<br>PP3 supporting                                                                            | BS3 supporting                                  | BS3 supporting                                                                                                                                                      | VUS                               | VUS                              | PMID 34233450 <sup>4</sup>                                                                                               | Fig. 2D<br>WES; NGS-based copy number analysis                                                                                                  |
| p.(Val91Glyfs*11)       | c.271_283del |                       |             |                                                                  | PVS1<br>PS4 supporting<br>PM2 moderate                                                                      | (PS3 moderate) <sup>‡</sup>                     | (PS3 strong) <sup>‡</sup><br>PMID 10508512 <sup>6</sup> (CFU defect)                                                                                                | pathogenic                        | pathogenic                       | PMID 10508512 <sup>6</sup>                                                                                               |                                                                                                                                                 |
| p.(Ser114Ala)           | c.340T>G     | 0.00001549 (NFE)      | 0.851       | RCV000685769.4<br>VUS (Invitae) <sup>†</sup>                     | PM1 supporting<br>PP3 supporting                                                                            | BS3 supporting                                  | BS3 supporting                                                                                                                                                      | VUS                               | VUS                              | PMID 32315381 <sup>7</sup><br>PMID 34233450 <sup>4</sup>                                                                 |                                                                                                                                                 |
| p.(Gly143Arg)           | c.427G>C     |                       | 0.947       |                                                                  | PS4 supporting<br>PS1 moderate (c.427G>A)<br>PM1 moderate<br>PM2 moderate<br>PP3 supporting                 | uncertain function, some evidence for TA defect | uncertain function, no secondary assays from the literature integrated, because of other/missing nucleotide change in case of a variant which might affect splicing | likely pathogenic                 | likely pathogenic                | PMID 22430633 <sup>8</sup> (different nucleotide change)<br>PMID: 24732596 <sup>9</sup> (nucleotide change not reported) |                                                                                                                                                 |
| p.(Arg205Trp)           | c.613C>T     |                       | 0.796       |                                                                  | PS4 supporting<br>PM2 moderate<br>PP3 supporting                                                            | PS3 moderate                                    | PS3 moderate                                                                                                                                                        | VUS                               | likely pathogenic                |                                                                                                                          | Fig. 2C<br>NGS-based sequencing of <i>RUNX1</i> ; no copy number analysis                                                                       |
| p.(Pro218Ser)           | c.652C>T     |                       | 0.444       | RCV000707170.2<br>VUS (Invitae) <sup>†</sup>                     | PS4 moderate (incl. ClinVar)<br>PM2 moderate                                                                | BS3 supporting                                  | BS3 supporting                                                                                                                                                      | VUS                               | VUS                              | PMID 29146883 <sup>10</sup><br>PMID 26316320 <sup>11</sup>                                                               | Fig. 2E<br>NGS panels (i) for myeloid malignancies <sup>‡</sup> and (ii) for thrombocytopenia <sup>‡</sup> ; SNP array for copy number analysis |
| p.(Arg223His)           | c.668G>A     | 0.00007028 (NFE)      | 0.488       |                                                                  |                                                                                                             | BS3 supporting                                  | BS3 strong<br>PMID:23817177 <sup>3</sup> (normal TA, DNA binding, dimerization)                                                                                     | VUS                               | VUS                              | PMID 34233450 <sup>4</sup><br>PMID 33075818 <sup>12</sup>                                                                | Fig. 2F<br>WES; NGS-based copy number analysis<br>Fig. 2G<br>Custom NGS panel <sup>‡</sup> ; NGS-based copy number analysis                     |
| p.(Gln259Lys)           | c.775C>A     | 0.00003096 (NFE)      | 0.1519      | RCV000697732.3<br>VUS (Invitae) <sup>†</sup>                     |                                                                                                             | BS3 supporting                                  | BS3 supporting                                                                                                                                                      | VUS                               | VUS                              | PMID 20955399 (JMML patient) <sup>13</sup>                                                                               |                                                                                                                                                 |

<sup>‡</sup> Our data provide evidence for the applicability of PS3 supporting for His58Asn, but other studies demonstrate functionality of this variant<sup>3</sup>, so we suggest no application of functional data due to conflicting results. <sup>†</sup> PS3 and PVS1 cannot be combined. <sup>‡</sup> Classifications from the submitter *Invitae* are based on general ACMG/AMP guidelines, but do not follow RUNX1-specific MM-VCEP recommendations. <sup>‡</sup> Custom NGS panel incl. *ANKRD26*, *ETV6*, *RUNX1*, *CYCS*, *SLFN14*, *DDX41*, and *STX11*. <sup>‡</sup> Custom NGS panel for myeloid malignancies incl. *ASXL1*, *BCOR*, *BCORL1*, *CALR*, *CBL*, *CSF3R*, *DNMT3A*, *ETV6*, *EZH2*, *FLT3*, *GATA2*, *IDH1*, *IDH2*, *JAK2*, *KIT*, *KRAS*, *MPL*, *NIPBL*, *NPM1*, *NRAS*, *PHF6*, *PTPN11*, *RAD21*, *RIT1*, *RUNX1*, *SETBP1*, *SF3B1*, *SMC1A*, *SMC3*, *SRSF2*, *STAG2*, *TET2*, *TP53*, *U2AF1*, *WT1*, and *ZRSR2*. <sup>‡</sup> Custom NGS panel for thrombocytopenia incl. *ABCG8*, *ABCG8*, *ACTN1*, *ANKRD26*, *AP3B1*, *AP3D1*, *BLOC1S3*, *BLOC1S6*, *CYCS*, *DIAPH1*, *DTNBP1*, *ETV6*, *FERMT3*, *FLI1*, *FLNA*, *FYB1*, *GATA1*, *GFI1B*, *GNAS*, *GP1BA*, *GP1BB*, *GP6*, *GP9*, *HOXA2*, *HPS1*, *HPS3*, *HPS4*, *HPS5*, *HPS6*, *ITGA2B*, *ITGB3*, *LYST*, *MECOM*, *MPIG6B*, *MPL*, *MYH9*, *NBEAL2*, *P2RY12*, *PLAU*, *PRKACG*, *PTPN11*, *RAB27A*, *RASGRP2*, *RBM8A*, *RGS18*, *RUNX1*, *SALL4*, *SLFN14*, *SRC*, *STIM1*, *TBXA2R*, *TBXAS1*, *TPM4*, *TRPM7*, *TUBB1*, *VIPAS39*, *VPS33B*, *VWF*, and *WAS*. <sup>‡</sup> *ACBD5*, *ACD*, *AK2*, *ANKRD26*, *AP3B1*, *ATR*, *BRCA1*, *BRCA2*, *BRIP1*, *CDAN1*, *CDIN1*, *CSF3R*, *CTC1*, *CXCR4*, *DKC1*, *DNAJC21*, *ELANE*, *EPO*, *ERCC4*, *ERCC6L2*, *ETV6*, *FANCA*, *FANCB*, *FANCC*, *FANCD2*, *FANCE*, *FANCF*, *FANCG*, *FANCI*, *FANCL*, *FANCM*, *G6PC3*, *GATA1*, *GATA2*, *GFI1*, *HAX1*, *HOXA11*, *JAGN1*, *KIF23*, *KLF1*, *LYST*, *MAD2L2*, *MASTL*, *MECOM*, *MPL*, *MYSM1*, *NAF1*, *NBN*, *NHP2*, *NOP10*, *PALB2*, *PARN*, *RAD51*, *RAD51C*, *RBM8A*, *RPL11*, *RPL15*, *RPL17*, *RPL18*, *RPL19*, *RPL26*, *RPL27*, *RPL31*, *RPL35*, *RPL35A*, *RPL5*, *RPS10*, *RPS15A*, *RPS17*, *RPS19*, *RPS20*, *RPS24*, *RPS26*, *RPS27*, *RPS28*, *RPS29*, *RPS7*, *RTEL1*, *RUNX1*, *SAMD9*, *SAMD9L*, *SBD5*, *SEC23B*, *SLC37A4*, *SLX4*, *SRP54*, *SRP72*, *TAZ*, *TBXAS1*, *TCIRG1*, *TERC*, *TERT*, *THPO*, *TINF2*, *TSR2*, *UBE2T*, *USB1*, *VPS13B*, *VPS45*, *WAS*, *WRAP53*, *XRCC2*, *ADA2*, *COP1*, *EFL1*, and *STN1*. Data from functional assays were included, regardless of the underlying nucleotide change, except for variants, which might affect splicing. EA – East Asian; LB – likely benign; NFE – Non-Finish European; NGS – next generation sequencing; w/o – without; w/ – with; TA – transcriptional activation assay; VUS – variant of uncertain significance; WES – whole exome sequencing.

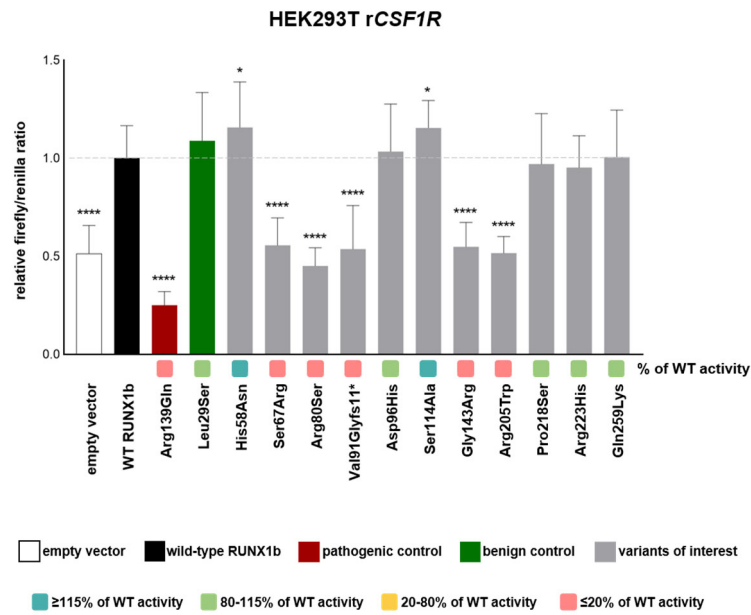

**Supplementary Figure 1. Transcriptional activation assay *rCSF1R* in HEK293T analyzing the set of *RUNX1b* variants of interest.**

The bar graph displays firefly/renilla ratios relative to wild-type *RUNX1b* (WT) (mean+ standard deviation (SD); 3 biological and 6 technical replicates; one-way ANOVA in comparison to WT; Dunnett’s post hoc test; \*, P ≤.05; \*\*, P ≤.01; \*\*\*, P ≤.001; \*\*\*\*, P ≤.0001).

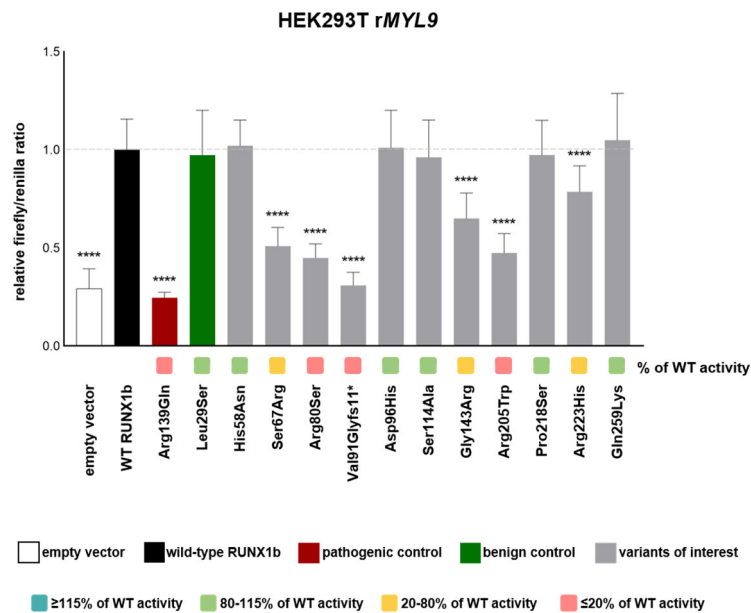

**Supplementary Figure 2. Transcriptional activation assay *rMYL9* in HEK293T analyzing the set of *RUNX1b* variants of interest.**

The bar graph displays firefly/renilla ratios relative to wild-type *RUNX1b* (WT) (mean+SD; 3 biological and 6 technical replicates; one-way ANOVA in comparison to WT; Dunnett’s post hoc test; \*, P ≤.05; \*\*, P ≤.01; \*\*\*, P ≤.001; \*\*\*\*, P ≤.0001).

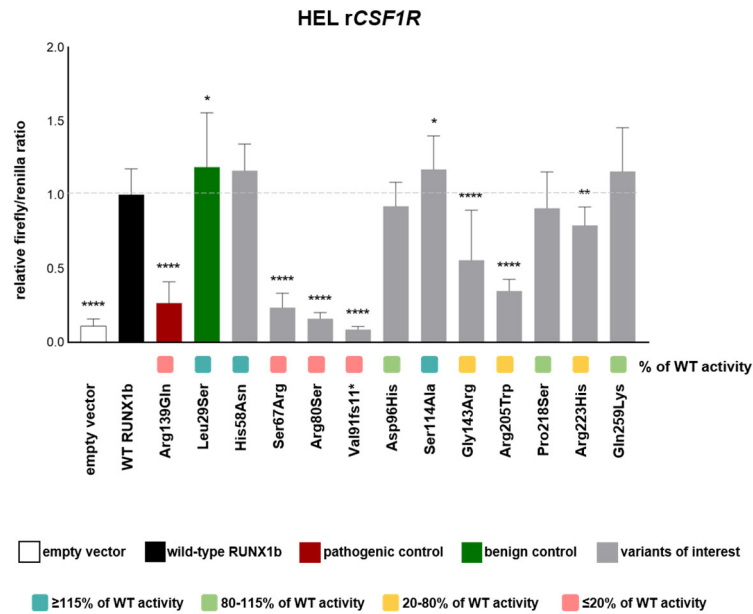

**Supplementary Figure 3. Transcriptional activation assay *rCSF1R* in HEL analyzing the set of *RUNX1b* variants of interest.** The bar graph displays firefly/renilla ratios relative to wild-type *RUNX1b* (WT) (mean+SD; 2 biological and 5 technical replicates; one-way ANOVA in comparison to WT; Dunnett's post hoc test; \*,  $P \leq .05$ ; \*\*,  $P \leq .01$ ; \*\*\*,  $P \leq .001$ ; \*\*\*\*,  $P \leq .0001$ ).

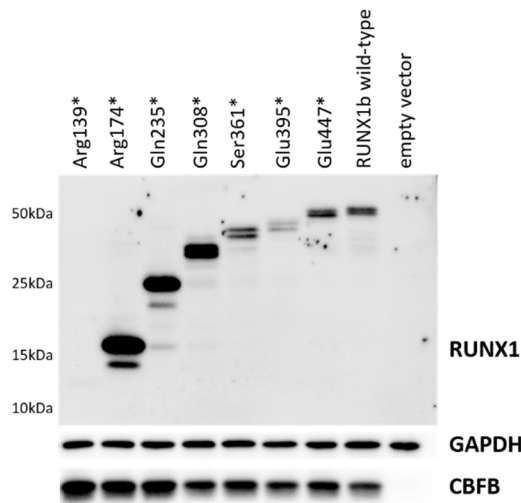

**Supplementary Figure 4. Representative Western Blot analyzing transfection conditions used for transactivation assays of missense variants in HEK293T cells.** Transfection and Western Blotting was performed as previously described<sup>14</sup>. The truncated protein variant *RUNX1b*-Arg139\* was too small to be clearly detected using standard conditions. Under these conditions, only a very slight band could be observed. However, the overexpression of Arg139\* and an YFP-tagged Arg139\* fusion protein has already been demonstrated by real-time PCR and western blotting, respectively<sup>14</sup>.

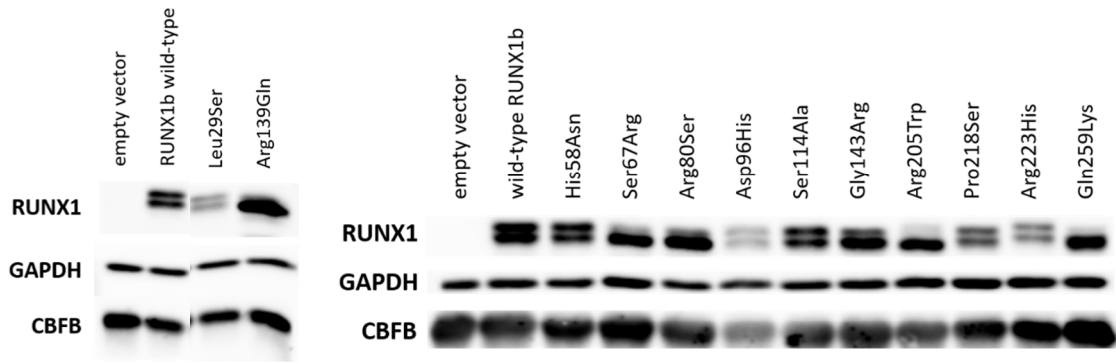

**Supplementary Figure 5. Representative Western Blot analyzing transfection conditions used for transactivation assays of VOI in HEK293T cells.** Transfection and Western Blotting was performed as previously described <sup>14</sup>.

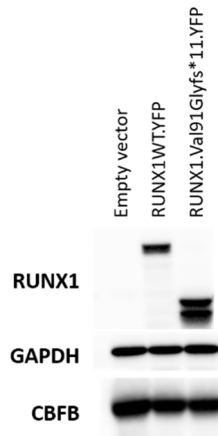

**Supplementary Figure 6. Representative Western Blot verifying the expression of RUNX1.Val91Glyfs\*11 in HEK293T cells.** As the resulting truncated RUNX1 protein is too small to be detected under standard western blot conditions, we analyzed the YFP-tagged WT and YFP-tagged variant RUNX1 protein as previously described <sup>14</sup>.

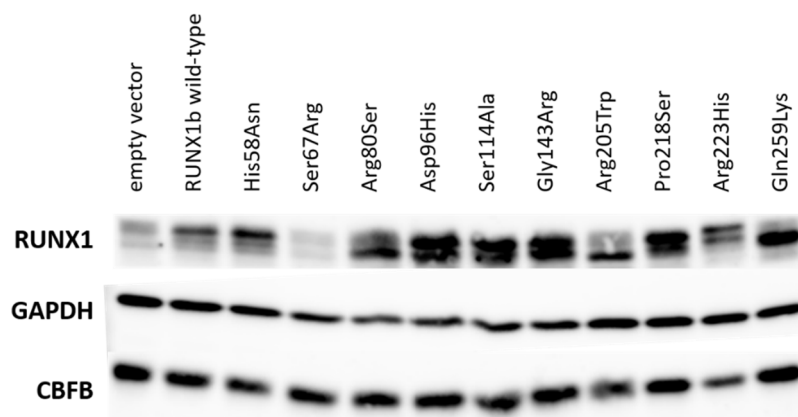

**Supplementary Figure 7. Representative Western Blot analyzing transfection conditions used for transactivation assays in HEL cells.** Transfection and Western Blotting was performed as previously described <sup>14</sup>.

## References

1. Richards S, Aziz N, Bale S, et al. Standards and guidelines for the interpretation of sequence variants: a joint consensus recommendation of the American College of Medical Genetics and Genomics and the Association for Molecular Pathology. *Genet Med*. 2015;17(5):405-424.
2. Luo X, Feurstein S, Mohan S, et al. ClinGen Myeloid Malignancy Variant Curation Expert Panel recommendations for germline *RUNX1* variants. *Blood Adv*. 2019;3(20):2962-2979.
3. Koh CP, Wang CQ, Ng CE, et al. *RUNX1* meets *MLL*: epigenetic regulation of hematopoiesis by two leukemia genes. *Leukemia*. 2013;27(9):1793-1802.
4. Homan CC, King-Smith SL, Lawrence DM, et al. The *RUNX1* Database (*RUNX1db*): establishment of an expert curated *RUNX1* registry and genomics database as a public resource for familial platelet disorder with myeloid malignancy. *Haematologica*. 2021.
5. Matheny CJ, Speck ME, Cushing PR, et al. Disease mutations in *RUNX1* and *RUNX2* create nonfunctional, dominant-negative, or hypomorphic alleles. *Embo j*. 2007;26(4):1163-1175.
6. Song WJ, Sullivan MG, Legare RD, et al. Haploinsufficiency of *CBFA2* causes familial thrombocytopenia with propensity to develop acute myelogenous leukaemia. *Nat Genet*. 1999;23(2):166-175.
7. Simon L, Spinella JF, Yao CY, et al. High frequency of germline *RUNX1* mutations in patients with *RUNX1*-mutated AML. *Blood*. 2020;135(21):1882-1886.
8. Buijs A, Poot M, van der Crabben S, et al. Elucidation of a novel pathogenomic mechanism using genome-wide long mate-pair sequencing of a congenital t(16;21) in a series of three *RUNX1*-mutated FPD/AML pedigrees. *Leukemia*. 2012;26(9):2151-2154.
9. Sakurai M, Kunimoto H, Watanabe N, et al. Impaired hematopoietic differentiation of *RUNX1*-mutated induced pluripotent stem cells derived from FPD/AML patients. *Leukemia*. 2014;28(12):2344-2354.
10. Bluteau O, Sebert M, Leblanc T, et al. A landscape of germ line mutations in a cohort of inherited bone marrow failure patients. *Blood*. 2018;131(7):717-732.
11. Antony-Debré I, Duployez N, Bucci M, et al. Somatic mutations associated with leukemic progression of familial platelet disorder with predisposition to acute myeloid leukemia. *Leukemia*. 2016;30(4):999-1002.
12. Ernst MPT, Kavelaars FG, Löwenberg B, Valk PJM, Raaijmakers MHGP. *RUNX1* germline variants in *RUNX1*-mutant AML: how frequent? *Blood*. 2021;137(10):1428-1431.
13. Pérez B, Kosmider O, Cassinat B, et al. Genetic typing of *CBL*, *ASXL1*, *RUNX1*, *TET2* and *JAK2* in juvenile myelomonocytic leukaemia reveals a genetic profile distinct from chronic myelomonocytic leukaemia. *Br J Haematol*. 2010;151(5):460-468.
14. Decker M, Lammens T, Ferster A, et al. Functional classification of *RUNX1* variants in familial platelet disorder with associated myeloid malignancies. *Leukemia*. 2021.
